# Supplementary material for: Development of Solid Lipid Nanoparticles by Cold Dilution of Microemulsions: Curcumin Loading, Preliminary In Vitro Studies, and Biodistribution
Source: PubMed Central journal article supplement (PMC6410061; doi:10.3390/nano9020230), 2019-02-08
Supplement: nanomaterials-09-00230-s001.pdf [file nanomaterials-09-00230-s001.pdf]

Supplementary

# Development of Solid Lipid Nanoparticles by Cold Dilution of Microemulsions: Curcumin Loading, Preliminary In Vitro Studies, and Biodistribution

Daniela Chirio <sup>1</sup>, Elena Peira <sup>1,\*</sup>, Chiara Dianzani <sup>1</sup>, Elisabetta Muntoni <sup>1</sup>, Casimiro Luca Gigliotti <sup>2</sup>, Benedetta Ferrara <sup>1</sup>, Simona Sapino <sup>1</sup>, Giulia Chindamo <sup>1</sup> and Marina Gallarate <sup>1</sup>

<sup>1</sup> Dipartimento di Scienza e Tecnologia del Farmaco, Università degli Studi di Torino, 10125 Torino, Italy; daniela.chirio@unito.it (D.C.); chiara.dianzani@unito.it (C.D.); elisabetta.muntoni@unito.it (E.M.); benedetta.ferrara@unito.it (B.F.); simona.sapino@unito.it (S.S.); giulia.chindamo@edu.unito.it (G.C.); marina.gallarate@unito.it (M.G.)

<sup>2</sup> Interdisciplinary Research Center of Autoimmune Diseases, Department of Health Sciences, "A. Avogadro" University of Eastern Piedmont, 28100 Novara, Italy; luca.gigliotti@med.unipmn.it (C.L.G.)

\* Corresponding Author: elena.peira@unito.it; Tel.: +39-011-670-7143

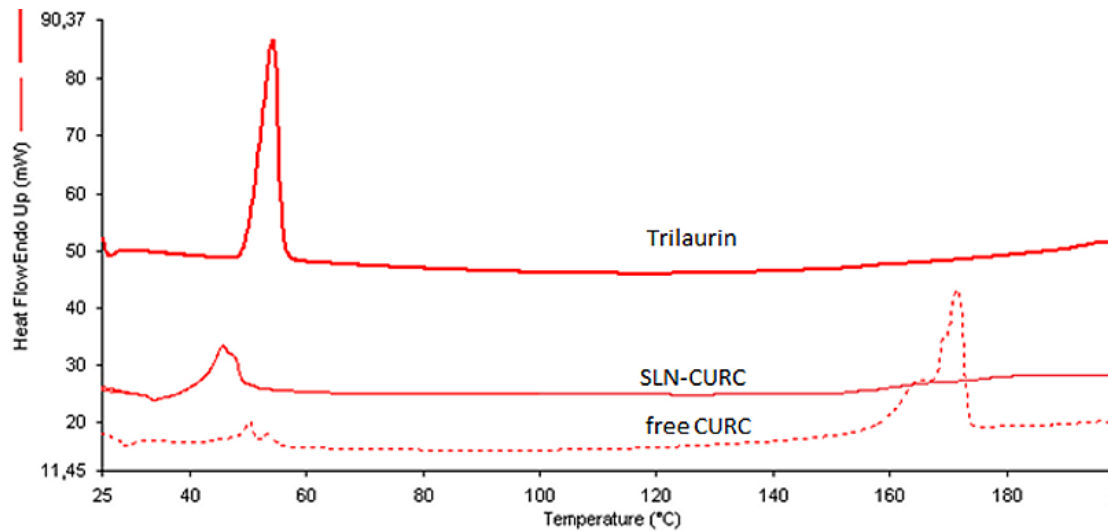

Figure 1. DSC thermograms of TL, CURC bulk material, and SLN-CURC after production and GF.
